# Supplementary material for: Bat assemblages from three Atlantic Forest fragments in Rio de Janeiro state, Southeastern Brazil
Source: Biodivers Data J. 2015 Jan 19;(3):e4404. doi: 10.3897/BDJ.3.e4404 (PMC4304264; doi:10.3897/BDJ.3.e4404)
Supplement: Supplementary material 1 — Data of rarefaction curve [file biodiversity_data_journal-3-e4404-s001.csv]

Samp size	Sumidouro	Std.err	Cantagalo	Std.err	Varre-Sai	Std.err
1	1	0	1	0	1	0
2	1,78531	0,41061	1,78	0,414246	1,66098	0,473378
3	2,41829	0,606692	2,40087	0,601591	2,13865	0,656407
4	2,94212	0,745232	2,90609	0,719598	2,51444	0,769445
5	3,38673	0,848337	3,32652	0,794266	2,83092	0,848413
6	3,77292	0,927581	3,68402	0,841531	3,1107	0,909272
7	4,11525	0,989857	3,99408	0,871497	3,36616	0,959357
8	4,42396	1,03955	4,26778	0,890289	3,60445	1,00201
9	4,70631	1,07961	4,51312	0,901384	3,83	1,03876
10	4,9675	1,11208	4,73604	0,906599	4,04572	1,07033
11	5,21131	1,13846	4,941	0,906781	4,25366	1,09713
12	5,44052	1,15985	5,13147	0,90224	4,4553	1,11948
13	5,6572	1,17708	5,31017	0,893009	4,65171	1,13765
14	5,86293	1,1908	5,47927	0,878981	4,84369	1,1519
15	6,05896	1,2015	5,64051	0,859974	5,03185	1,16249
16	6,24624	1,20958	5,79526	0,835739	5,2166	1,16966
17	6,42557	1,21535	5,94456	0,805938	5,39825	1,17361
18	6,59758	1,21907	6,08921	0,77009	5,57703	1,17453
19	6,76281	1,22096	6,22977	0,727475	5,75308	1,17257
20	6,92173	1,2212	6,36663	0,676978	5,92651	1,16786
21	7,07473	1,21994	6,5	0,616794	6,0974	1,1605
22	7,22215	1,21731	6,63	0,543791	6,26577	1,15056
23	7,36429	1,21344	6,75667	0,451799	6,43167	1,13807
24	7,50144	1,20843	6,88	0,324962	6,5951	1,12307
25	7,63383	1,20237	7	0	6,75609	1,10554
26	7,76168	1,19535	0	0	6,91463	1,08545
27	7,88521	1,18746	0	0	7,07073	1,06273
28	8,00459	1,17875	0	0	7,22439	1,03729
29	8,11999	1,1693	0	0	7,37561	1,00898
30	8,23158	1,15916	0	0	7,52439	0,977617
31	8,3395	1,14841	0	0	7,67073	0,942954
32	8,44389	1,13708	0	0	7,81463	0,90466
33	8,54488	1,12522	0	0	7,9561	0,862291
34	8,64259	1,11289	0	0	8,09512	0,815246
35	8,73713	1,10013	0	0	8,23171	0,762688
36	8,82862	1,08697	0	0	8,36585	0,703397
37	8,91715	1,07345	0	0	8,49756	0,6355
38	9,00282	1,0596	0	0	8,62683	0,555843
39	9,08573	1,04546	0	0	8,75366	0,458309
40	9,16597	1,03105	0	0	8,87805	0,327229
41	9,24362	1,0164	0	0	9	0
42	9,31876	1,00154	0	0	0	0
43	9,39147	0,986475	0	0	0	0
44	9,46184	0,971237	0	0	0	0
45	9,52993	0,955841	0	0	0	0
46	9,59582	0,940302	0	0	0	0
47	9,65958	0,924633	0	0	0	0
48	9,72127	0,908844	0	0	0	0
49	9,78096	0,892944	0	0	0	0
50	9,83872	0,876942	0	0	0	0
51	9,89461	0,86084	0	0	0	0
52	9,94869	0,844643	0	0	0	0
53	10,001	0,828349	0	0	0	0
54	10,0517	0,811957	0	0	0	0
55	10,1007	0,795463	0	0	0	0
56	10,1481	0,778859	0	0	0	0
57	10,1941	0,762135	0	0	0	0
58	10,2385	0,745279	0	0	0	0
59	10,2816	0,728276	0	0	0	0
60	10,3233	0,711104	0	0	0	0
61	10,3638	0,693743	0	0	0	0
62	10,4029	0,676164	0	0	0	0
63	10,4409	0,658335	0	0	0	0
64	10,4777	0,640219	0	0	0	0
65	10,5135	0,621774	0	0	0	0
66	10,5482	0,602947	0	0	0	0
67	10,5819	0,583681	0	0	0	0
68	10,6146	0,563905	0	0	0	0
69	10,6465	0,543539	0	0	0	0
70	10,6775	0,522483	0	0	0	0
71	10,7077	0,500621	0	0	0	0
72	10,7371	0,477807	0	0	0	0
73	10,7658	0,453863	0	0	0	0
74	10,7939	0,42856	0	0	0	0
75	10,8214	0,401597	0	0	0	0
76	10,8482	0,372567	0	0	0	0
77	10,8746	0,340889	0	0	0	0
78	10,9005	0,305682	0	0	0	0
79	10,9259	0,265476	0	0	0	0
80	10,9509	0,217428	0	0	0	0
81	10,9756	0,154257	0	0	0	0
82	11	0	0	0	0	0
